# Supplementary figures and images for: Genome sequencing and analysis of Aspergillus oryzae
Source: Springer Nature journal article supplement (doi:10.1038/nature04300), 2005-12-01

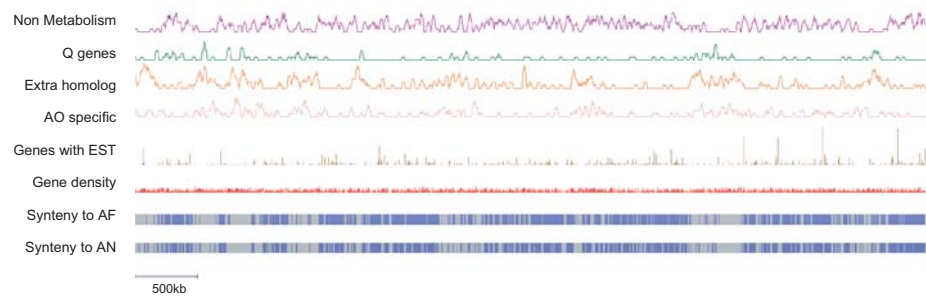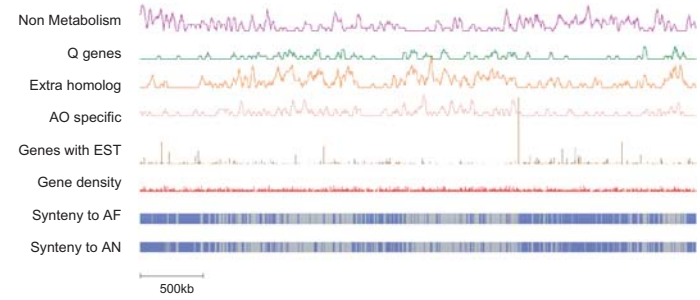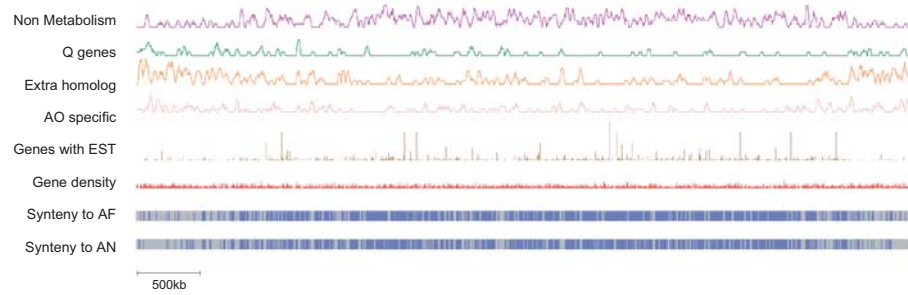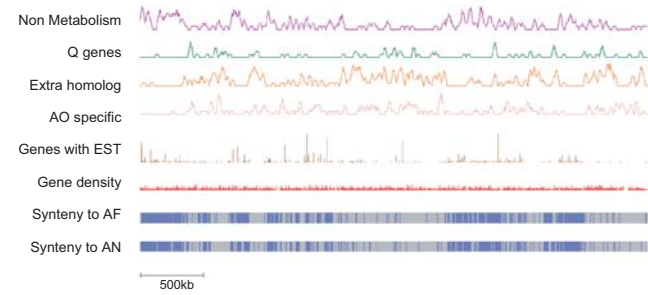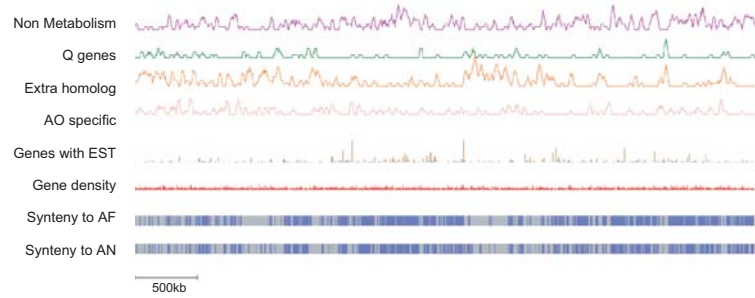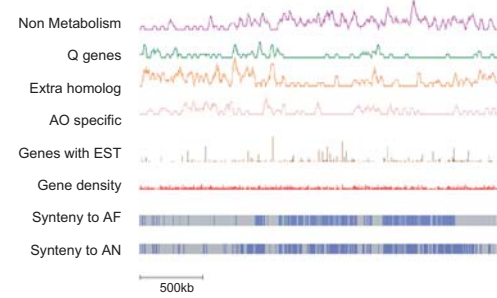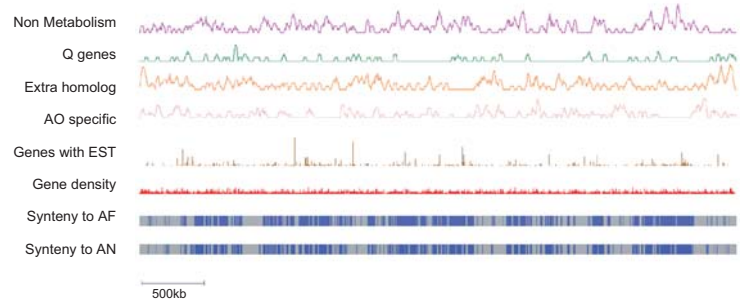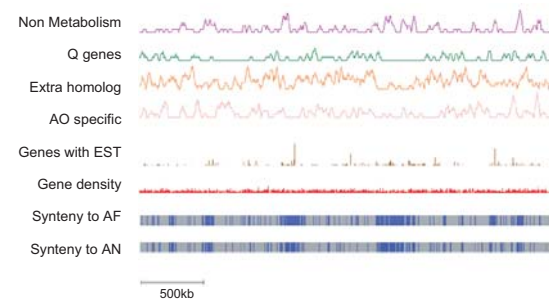

Supplementary Figure S2 Machida et al

Supplement: 41586_2005_BFnature04300_MOESM3_ESM.pdf [file 41586_2005_BFnature04300_MOESM3_ESM.pdf]

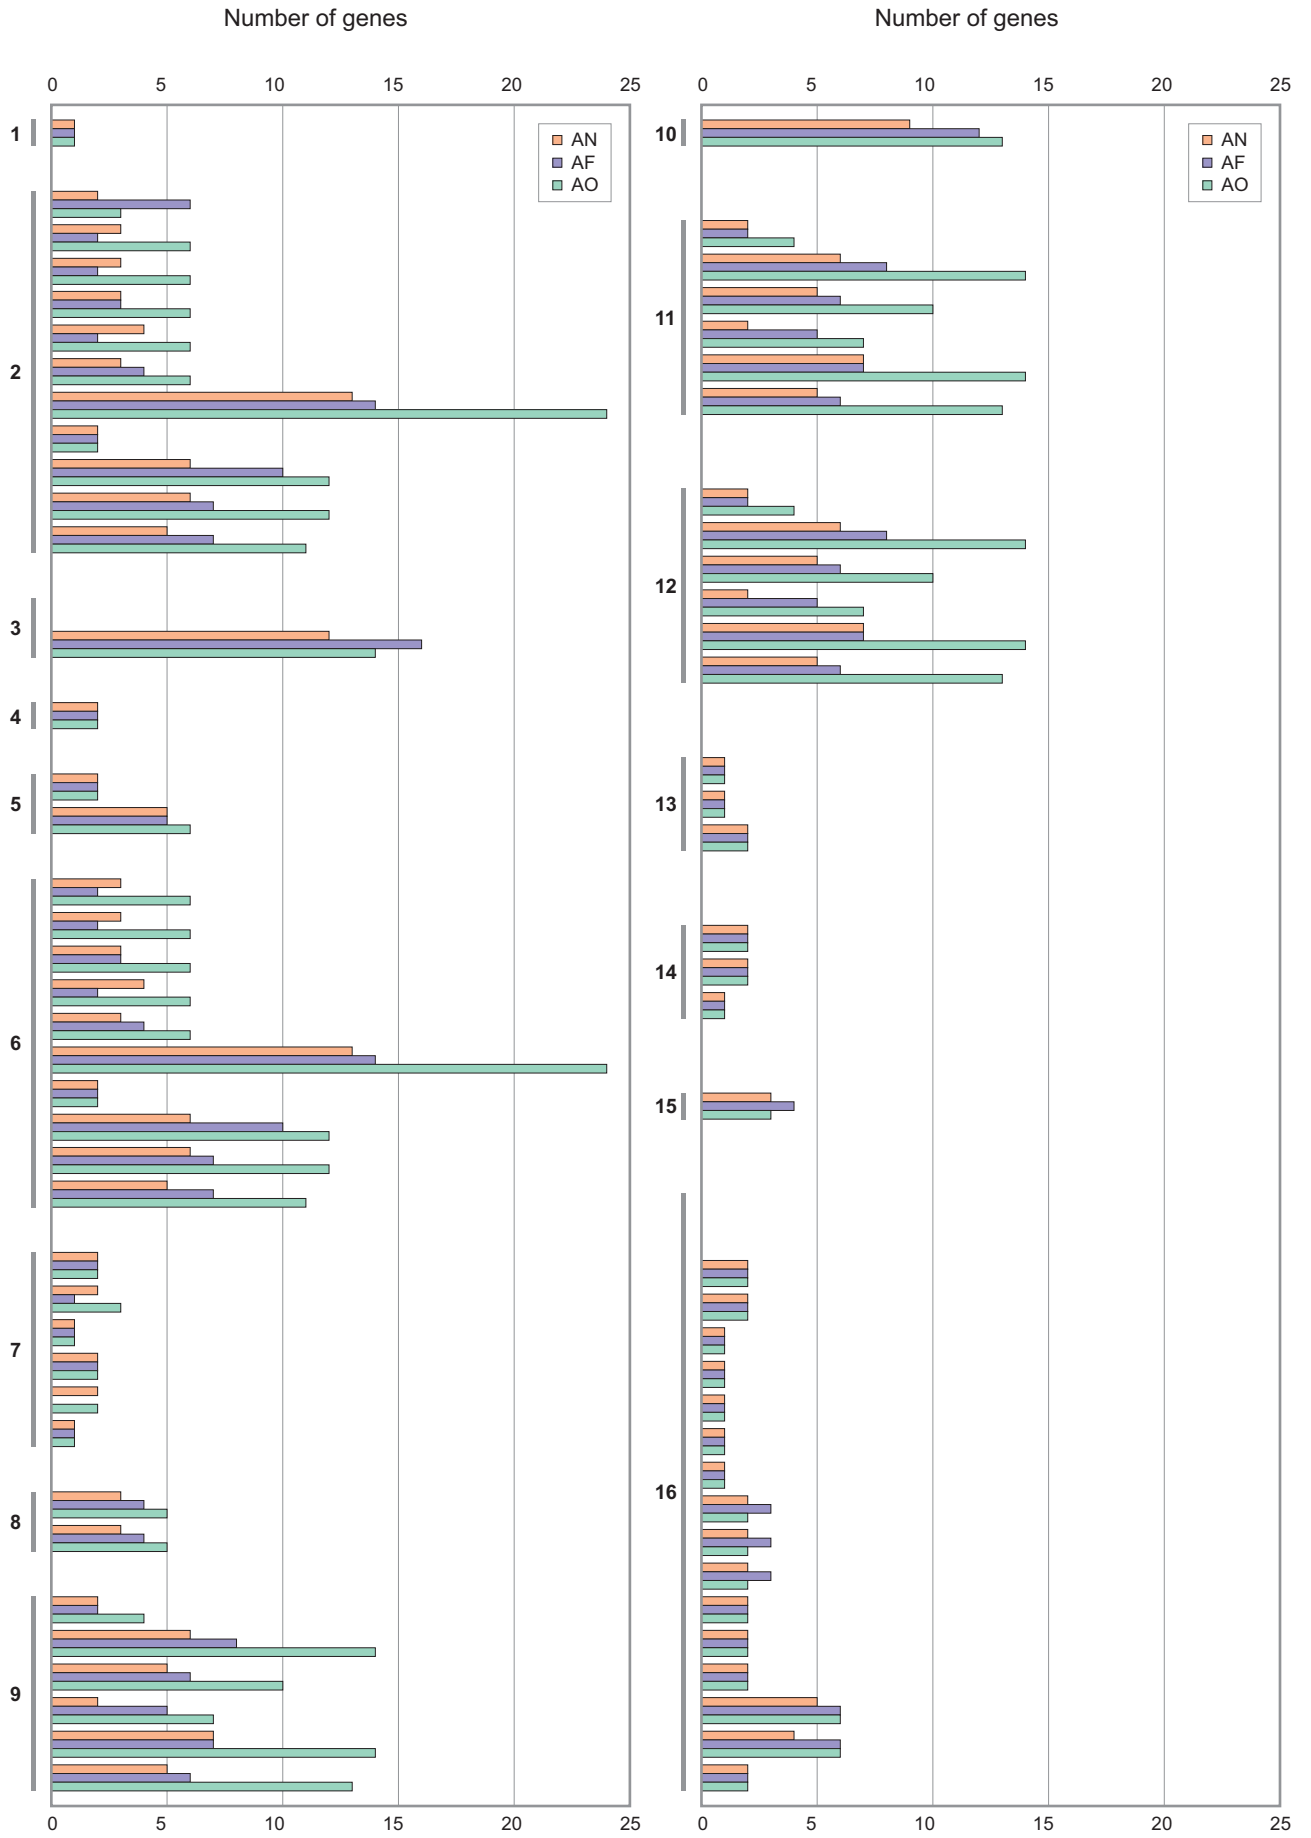

Supplementary Figure S3 Machida et al

Supplement: 41586_2005_BFnature04300_MOESM4_ESM.pdf [file 41586_2005_BFnature04300_MOESM4_ESM.pdf]

a.

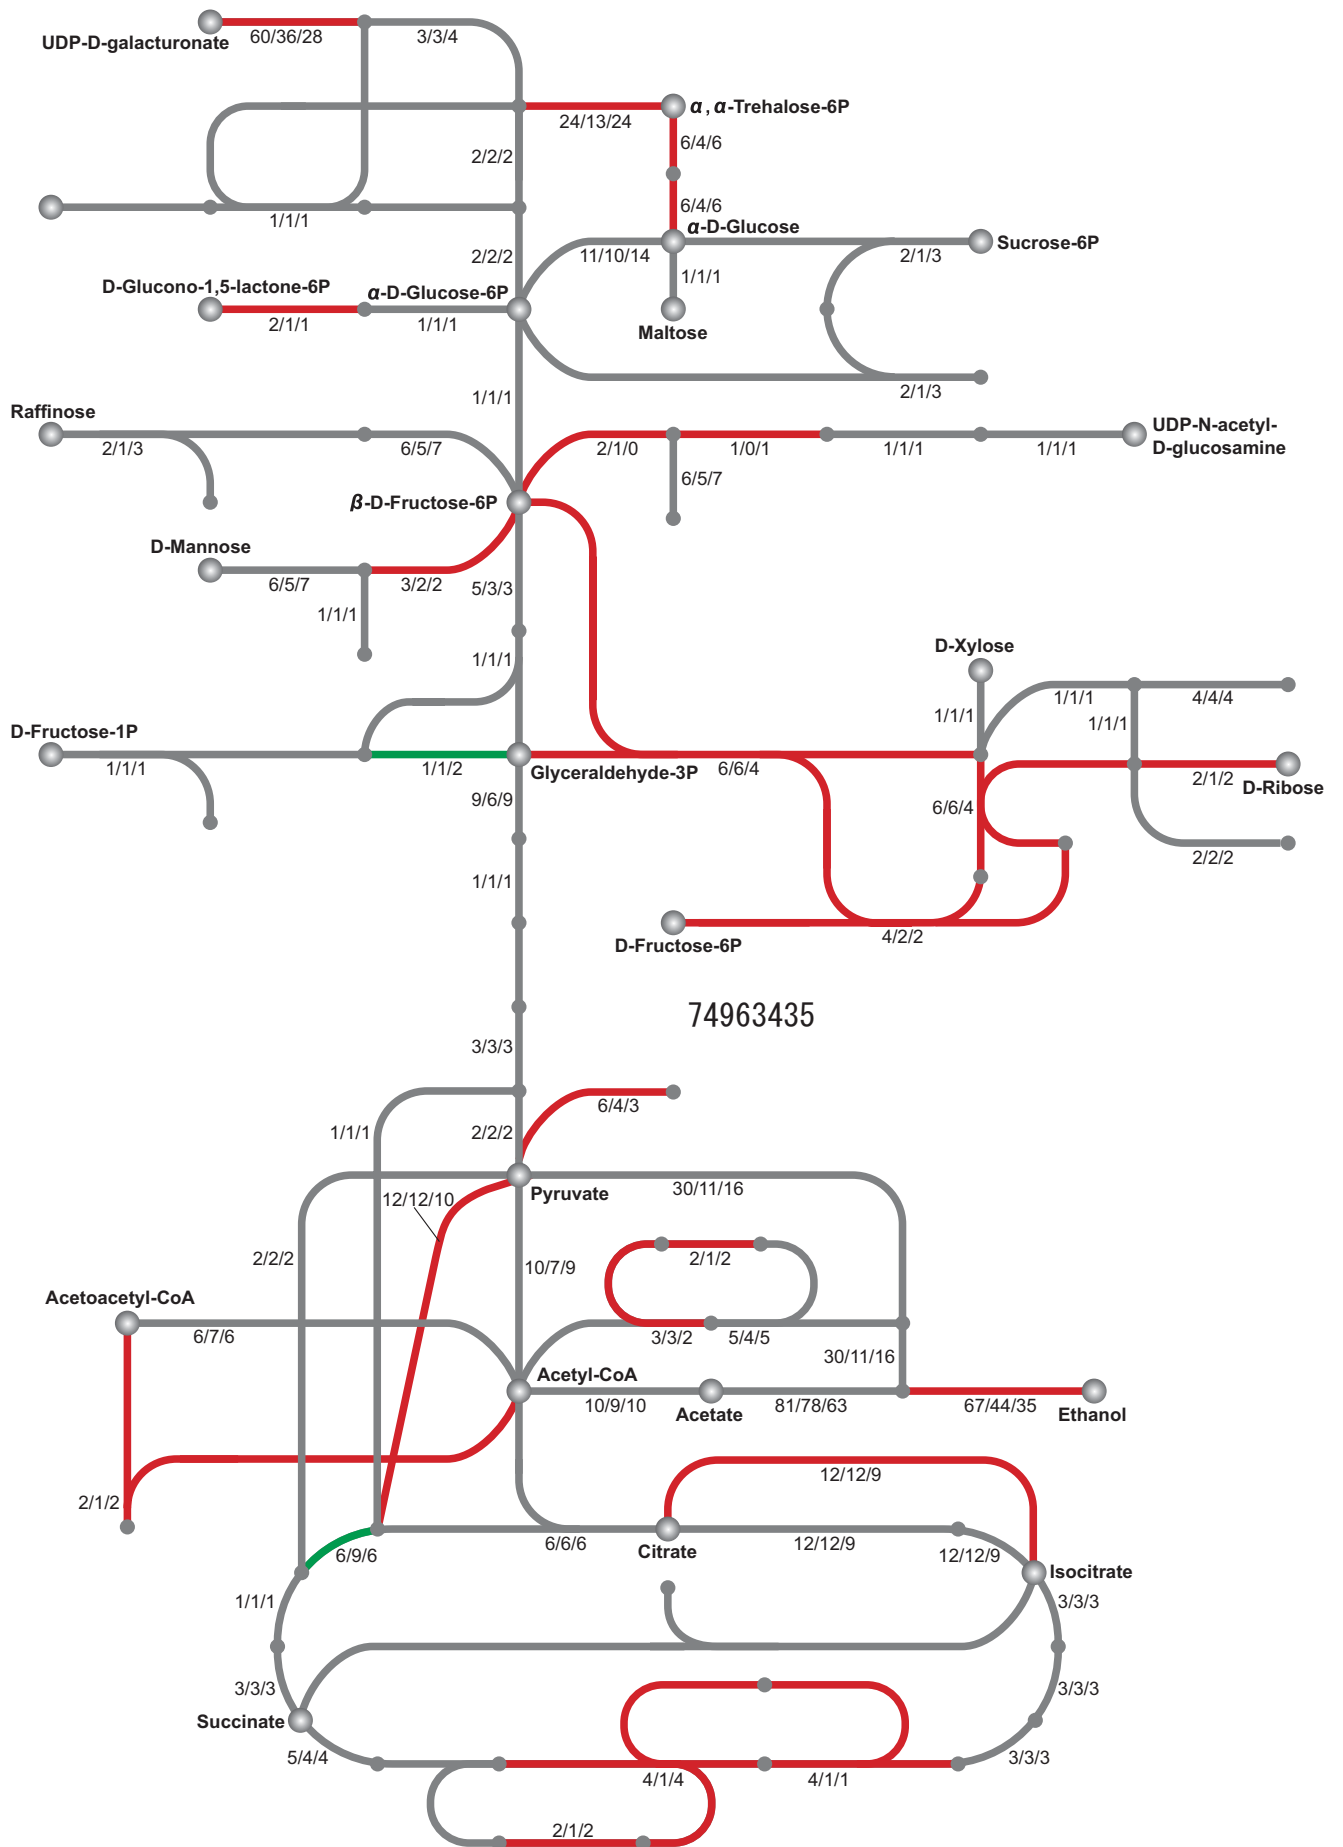

b.

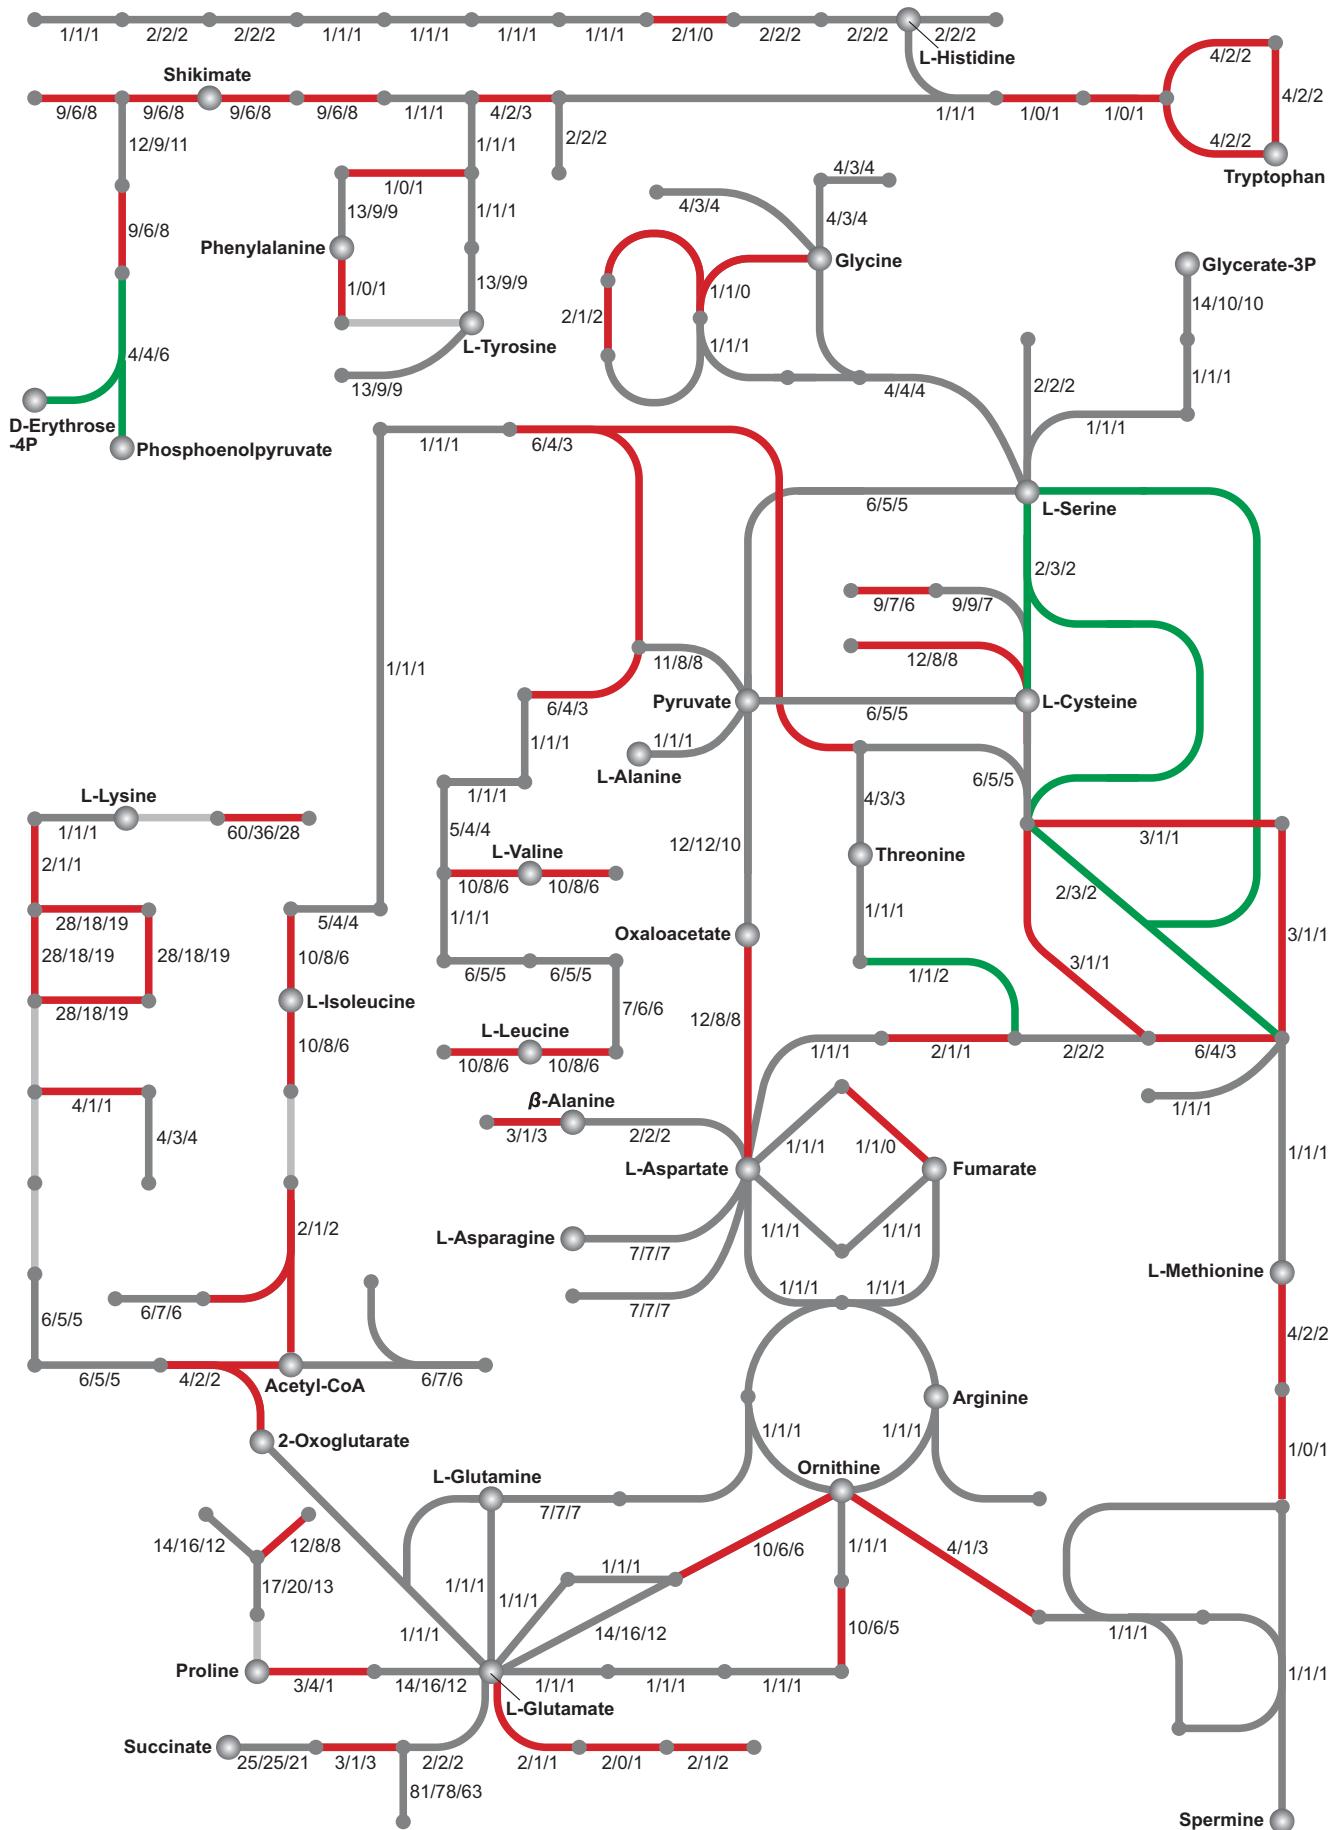

C.

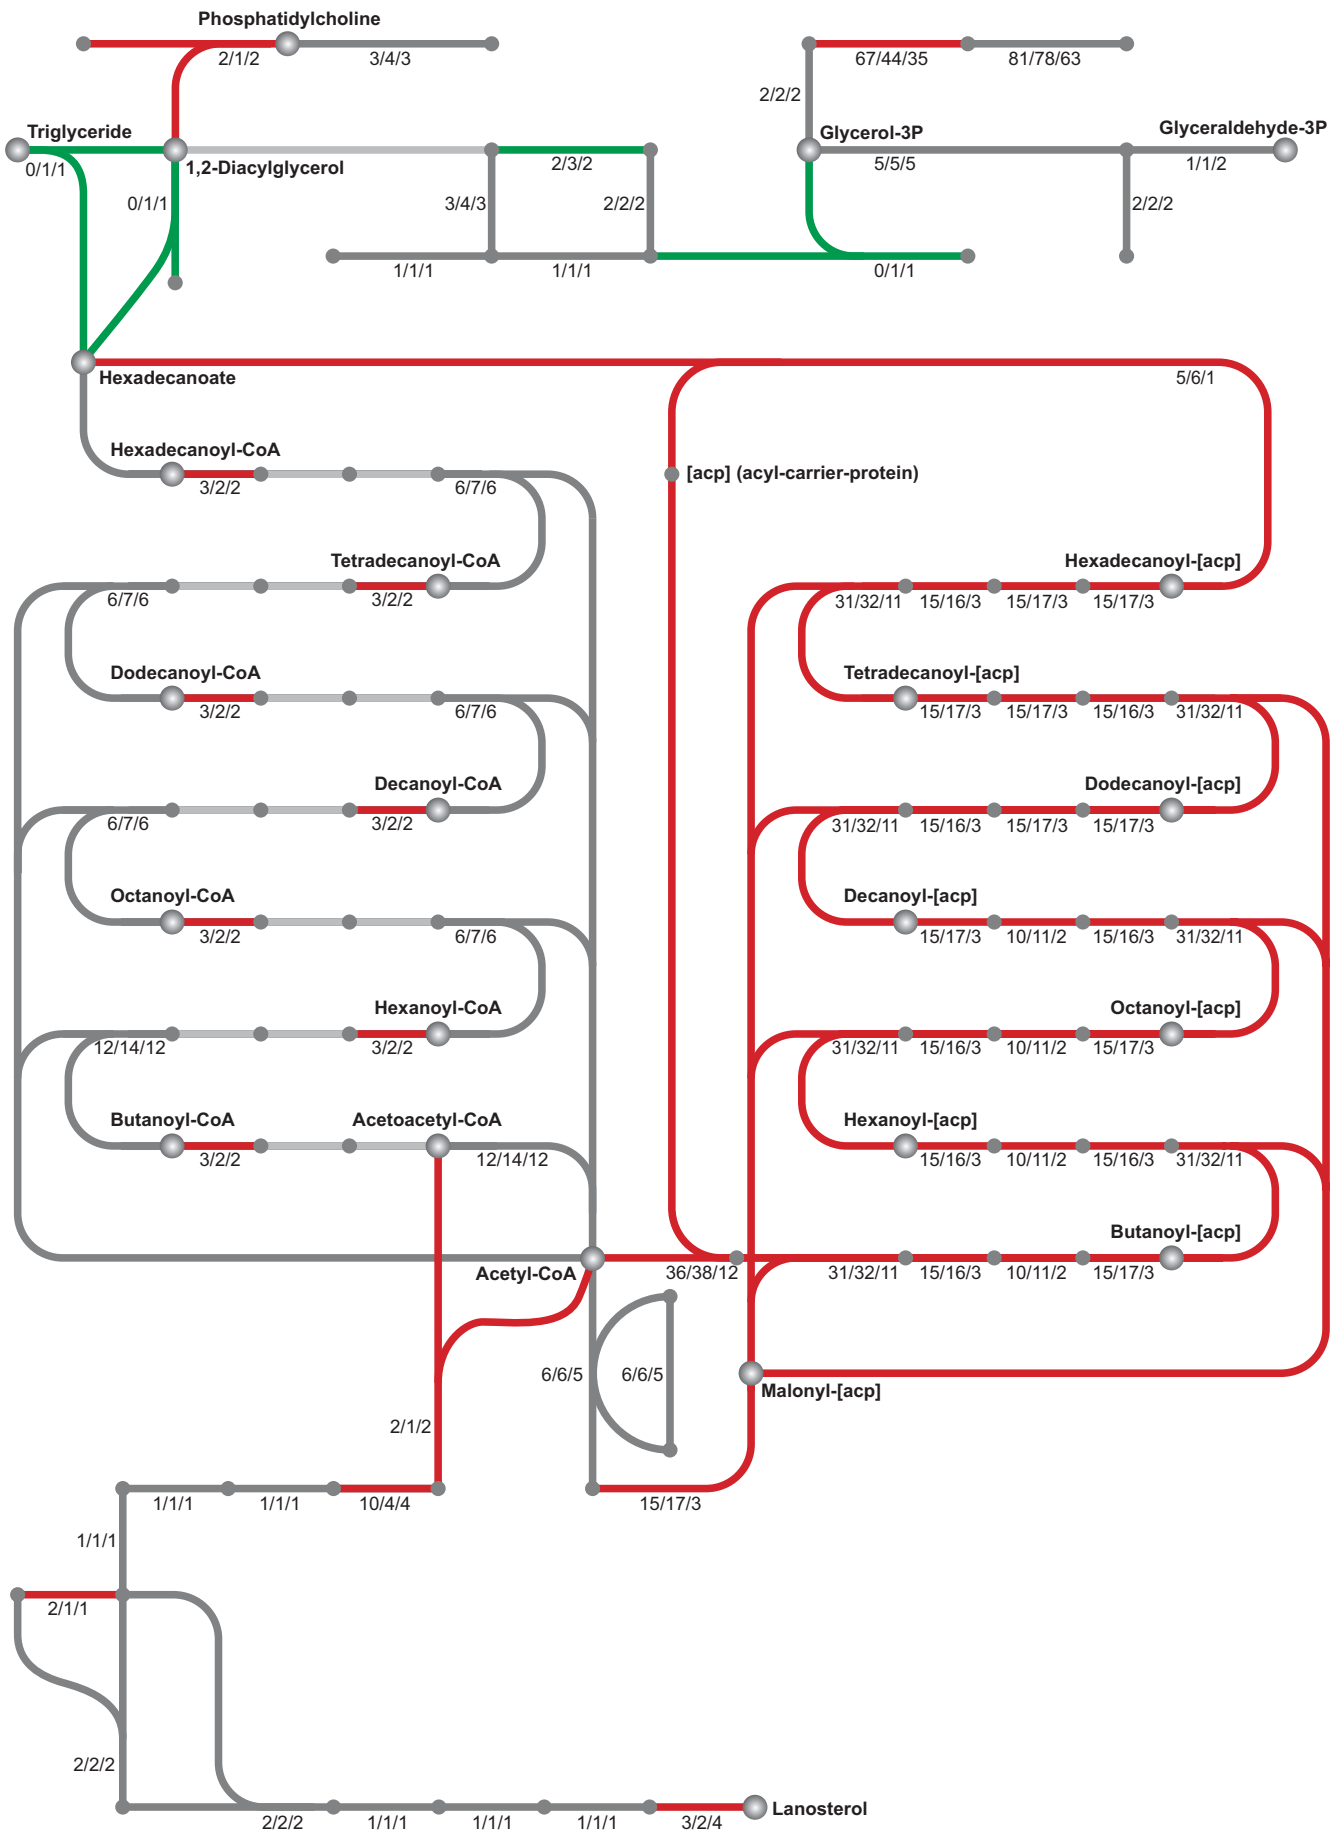

Supplement: 41586_2005_BFnature04300_MOESM5_ESM.pdf [file 41586_2005_BFnature04300_MOESM5_ESM.pdf]

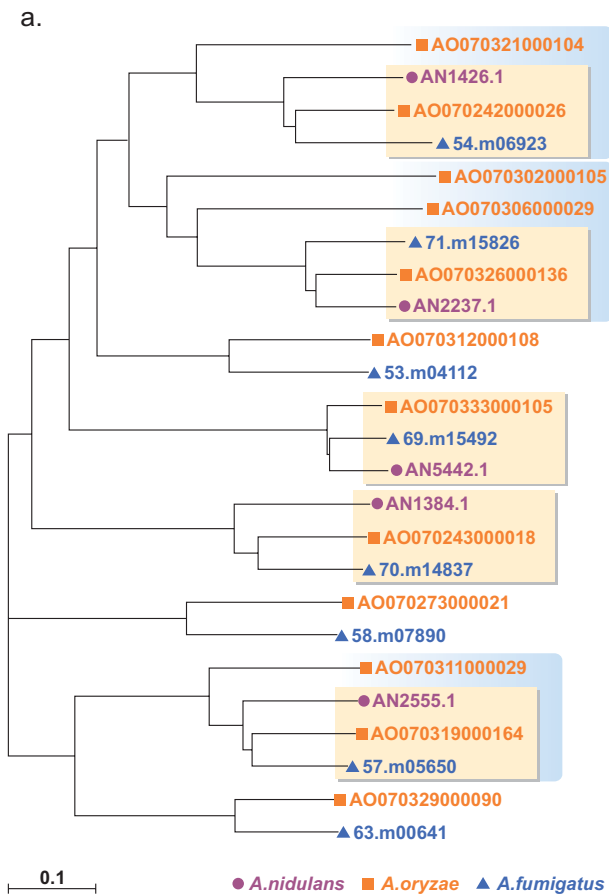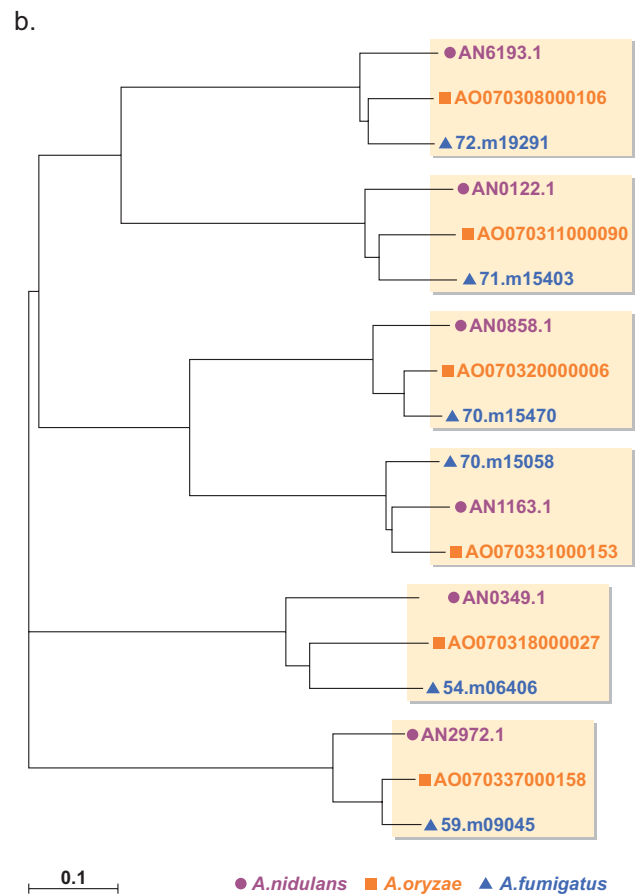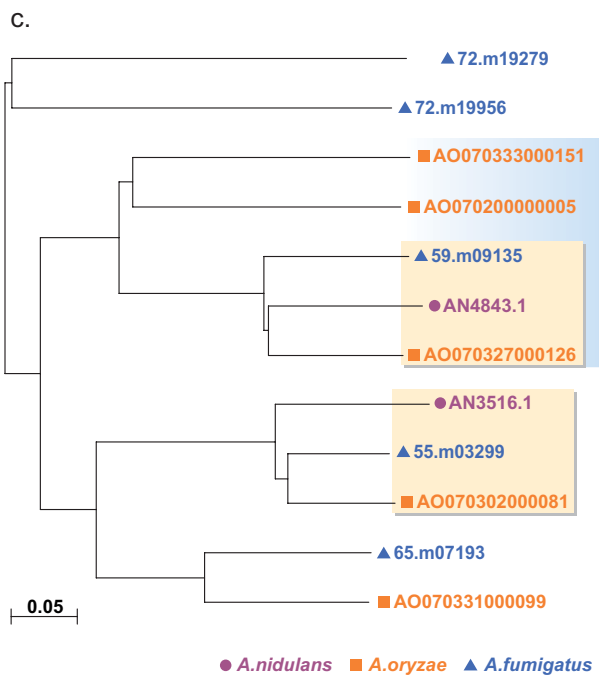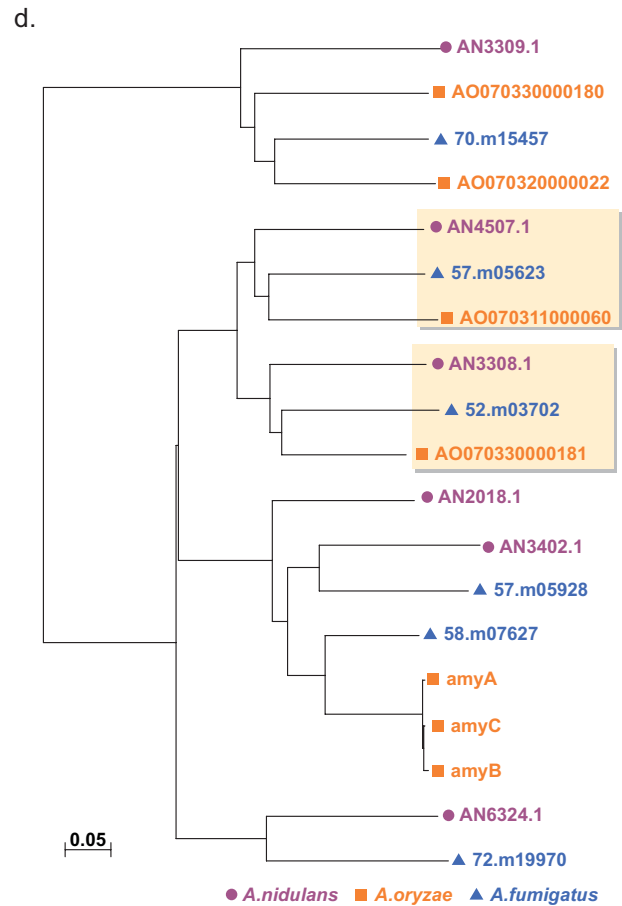

Supplement: 41586_2005_BFnature04300_MOESM6_ESM.pdf [file 41586_2005_BFnature04300_MOESM6_ESM.pdf]

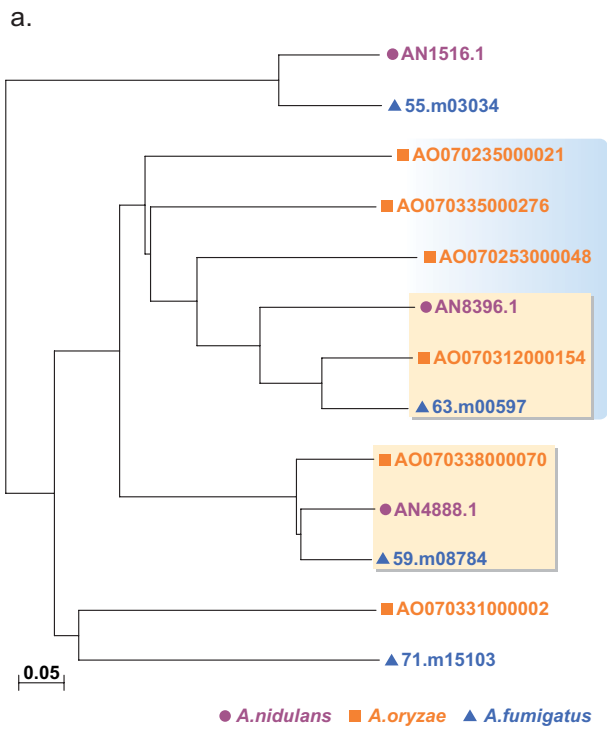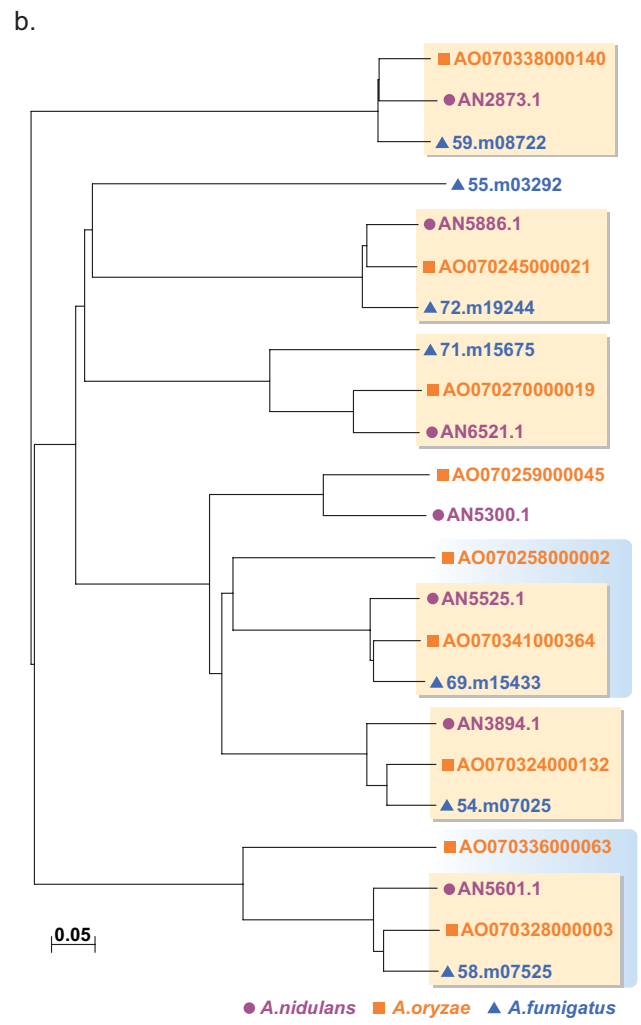

Supplement: 41586_2005_BFnature04300_MOESM7_ESM.pdf [file 41586_2005_BFnature04300_MOESM7_ESM.pdf]

a.

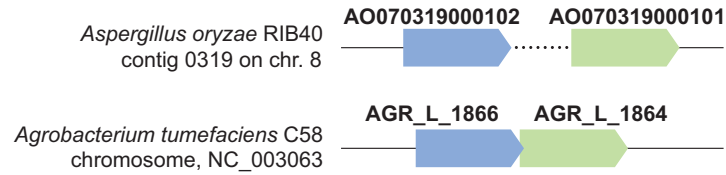

b.

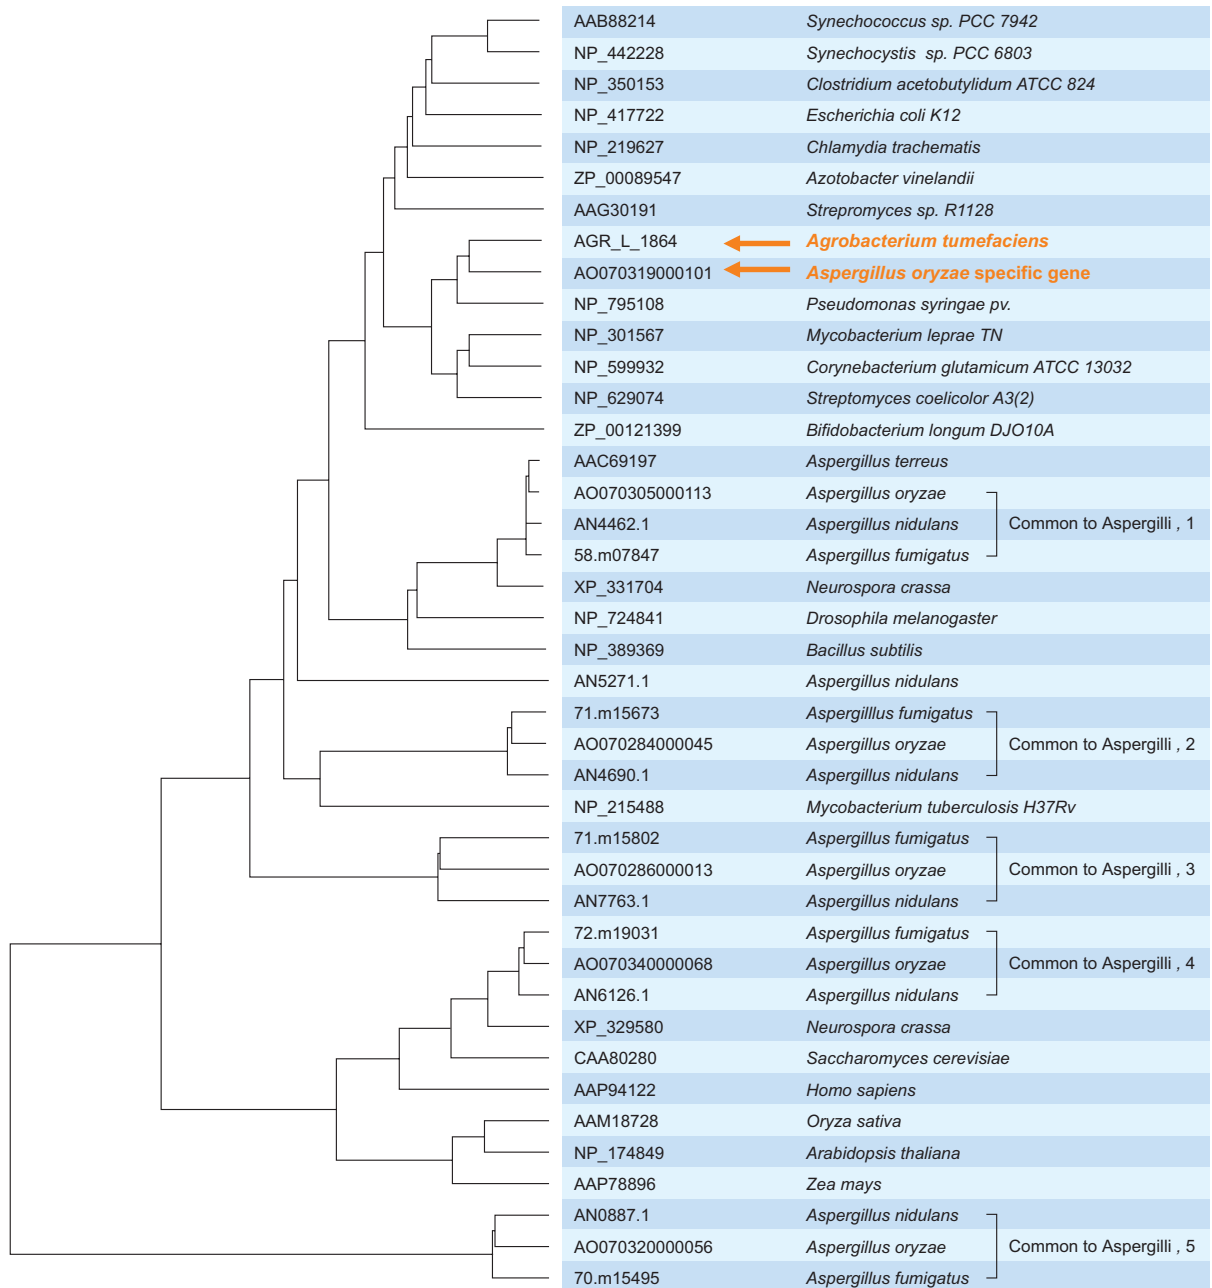

c.

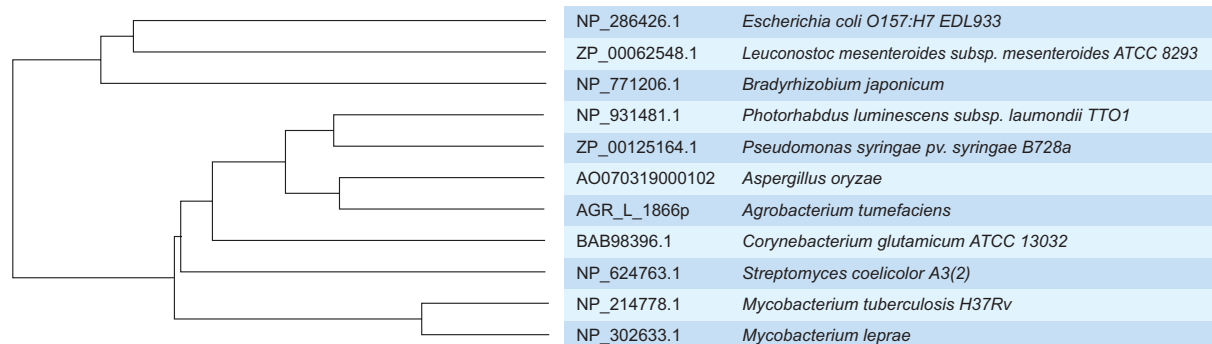

Supplement: 41586_2005_BFnature04300_MOESM8_ESM.pdf [file 41586_2005_BFnature04300_MOESM8_ESM.pdf]
